# **Hierarchical modulation of auditory prediction error signaling is independent of attention**

Kompus, K., Volehaugen, V., Westerhausen, R.

1 – Department of Biological and Medical Psychology, University of Bergen

2 – Department of Psychology, University of Oslo

Keywords: predictive coding, hierarchical processing, mismatch negativity

Corresponding author:

Kristina Kompus

Kristiina.kompus@uib.no

## Abstract

The auditory system is tuned to detect rhythmic regularities or irregularities in the environment which can occur on different timescales, i.e. regularities in short (local) and long (global) timescale which could conflict or converge. While MMN and P3b are thought to index local and global deviance, respectively, it is not clear how these hierarchical levels interact and to what extent attention modulates this interaction. We used a hierarchical oddball paradigm with local (sequence-level) and global (block-level) violations of regularities in 5-tone sequences, in attended and unattended conditions. Amplitude of negativity in the N2 timeframe and positivity in the P3b timeframe elicited by the final tone in the sequence were analyzed in a 2\*2\*2 factorial model (local status, global status, attention condition). We found a significant interaction between the local and global status of the final tone on the N2 amplitude ( $p < .001$ ,  $\eta_p^2 = .55$ ), while there was no significant three-way interaction with attention ( $p > .05$ ), together demonstrating that lower-level prediction error is modulated by detection of higher-order regularity but expressed independently of attention. Regarding P3b amplitude, we found significant main effect of global status ( $p < .001$ ,  $\eta_p^2 = .42$ ), and an interaction between global status and attention ( $p < .001$ ,  $\eta_p^2 = .70$ ). Thus, higher-level prediction error, indexed by P3b, is sensitive to global regularity violations if the auditory stream is attended. The results demonstrate the capacity of our auditory perception to rapidly resolve conflicts between different levels of predictive hierarchy as indexed by MMN modulation, while P3b represents a different, attention-dependent system.

## 1 **Introduction**

2 Our perception relies on prediction to facilitate the decoding of the sensory information. The  
3 predictive coding theories of perception suggest that the brain tries to minimize the surprise or  
4 prediction error, and continuously uses the unpredicted portion of the sensory input to adjust  
5 the predictive models (1). A crucial component of the predictive coding is the hierarchical  
6 organization of perceptual systems, with higher levels which represent slower-changing  
7 regularities modulating the processing of lower-level predictive units which integrate over  
8 shorter time (2). Such nested hierarchical system are crucial in human speech processing,  
9 where the probability of a sound depends on its immediate local environment such as the  
10 syllable structure, whereas word and sentence rules in the given language give wider context  
11 which would need to be taken into account when predicting the subsequent sound (3). How  
12 such hierarchically nested rules are extracted from the auditory stream, how they interact with  
13 each other and other systems such as attention and long-term memory are central to our  
14 understanding of auditory perception.

15 Unpredictable deviations from predicted pattern in auditory input are detected and given  
16 special processing in the auditory analysis of the incoming sounds. This can be detected using  
17 event-related potentials, where mismatch negativity (MMN), a negativity best visible in the  
18 difference wave between a predicted and an unpredicted stimulus, arises 150-250 ms after the  
19 onset of the deviant (4). While neuronal adaptation contributes to the MMN generation, the  
20 MMN cannot be fully explained by adaptation as it can be elicited by a deviant which is  
21 physically identical to the standard but violates an otherwise established rule (5, 6). MMN has  
22 been suggested to reflect the prediction error which results when a perceptual predictive  
23 model meets sensory input (7). The portion of the input which is compatible with the model  
24 will be attenuated, whereas the unpredicted portion will be propagated further and used to  
25 update the predictive model. This would explain why physically more different stimuli, as

26 well as less probable stimuli lead to larger MMN: there capacity of the model to explain the  
27 incoming information is lower, and consequently larger error variance will be propagated (7,  
28 8).

29 Most MMN studies have examined the predictability of a stimulus with regard to its  
30 immediate environment: the immediately preceding sounds, presented with relatively short  
31 interstimulus interval (<1000 ms), where the predictive model would predict continuation of  
32 the pattern established by the immediately preceding stimuli (9). However, in addition to such  
33 “local” rules which govern whether the stimulus is predictable from a short train of preceding  
34 stimuli, there could be more general rules about the predictability of the current stimulus in a  
35 wider context, which could agree with or diverge from the local rules. For example, a  
36 stimulus which is locally unpredictable, deviating from several preceding identical stimuli,  
37 could be following a rule establishing its regular occurrence over a longer time period. Such  
38 “global” rule would take into account the probability of the stimulus in a more complex  
39 situation. Paradigms which have examined such “local”/“global” rules have used a set-up  
40 where two stimuli, A and B, are presented in regularly structured sequences (e.g., AAAAB),  
41 so that the model could build up an expectancy about a physical deviant, which could be  
42 rarely violated by a physical standard (e.g., by a sequence AAAAA) (10). Such pattern  
43 extraction-MMN (11) has elicited considerable interest as it addresses the question how the  
44 auditory system can efficiently represent the often complicated and conflicting rules  
45 governing the probability of stimuli.

46 It has been suggested that simple tone *vs.* complex pattern deviations, corresponding to  
47 violating the local and the global rule, respectively, are processed by different neural systems,  
48 with simple-feature deviance-detection occurring at earlier levels of auditory processing and  
49 increasingly complex rule deviations detected on higher levels (12). An important question,  
50 however, is whether the higher levels can modify the processing in the earlier levels, as

51 suggested by the hierarchical coding model (1): when the global rule has been learned, can it  
52 modify the detection of the deviance due to the local rule, and suppress the MMN for a  
53 stimulus which differs from its immediate environment but is predictable according to the  
54 global rule?

55 The MMN generation to an unpredictable stimulus also appears to be connected to the  
56 distribution of attentional resources: an unexpected deviance which the subjects can detect  
57 typically elicits not only the MMN but also ERPs associated to attention, such as the P3a  
58 component which has been linked to general novelty-processing and attention-switching  
59 mechanisms (13). However, the link between MMN and attentional processes does not appear  
60 to be directly causal: the P3a is not an obligatory sequel to MMN, but instead appears to  
61 depend on the level of MMN or be linked to N1 instead (14-16). Another aspect of the MMN-  
62 attention relationship is the question whether attentional resources are required for deviance  
63 detection to unfold in the first place. While MMN is often referred to as attention-  
64 independent, relying on the observation that a robust MMN is elicited when the subjects are  
65 attending visual stimuli (5), it has been proposed that attention can reorganize the auditory  
66 stream before it is passed on to the processes which lead to MMN generation (17). One  
67 interesting situation where such attention-dependent reorganization could have a substantial  
68 effect is the detection of regularities which unfold over a longer time period: seconds or even  
69 minutes.

70 Crucially, however, global-rule formation has been suggested to be attention-dependent. An  
71 influential series of studies (10, 18-20) has used a local/global paradigm where five-tone  
72 sequences (AAAAA or AAAAB) are presented within a longer block of sequences, where  
73 each sequence can be either typical to the block (i.e., majority of the sequences are the same  
74 type) or differ from the rule imposed by the majority within the block. In this situation two  
75 hierarchically distinct predictions can be made: local predictions about the fifth tone in the

76 sequence, and global predictions about the probability of the fifth tone while taking into  
77 account the probability of the five-tone sequence in the context of the current block. These  
78 studies have suggested that there is interaction between the global deviance processing and  
79 attention: while the local rule representation is done automatically and independently of  
80 attention, detecting the deviance from the global rules is performed by a system which is  
81 dependent on the ability to dedicate conscious attention to the auditory input. With this  
82 paradigm, the violation of the global rules (the five-tone sequence differs from a rule of the  
83 group) has been noticed to elicit P3b component, which is not elicited when the subjects are  
84 not actively attending the stimuli. This has led to the suggestion that the global rule  
85 representation is performed in different neural structures, which are indexed by the P3b  
86 generation, and the operation of these structures is reliant on the availability of the global  
87 workspace. This attention-dependent higher-order rule can then, when it has been formed,  
88 regulate the “local” effect which is elicited in the MMN timeframe (21). Such dual-process  
89 view with attention-dependent context processing, however, conflicts with the studies that  
90 demonstrate that violation of an established pattern of sounds which unfolds over longer time  
91 interval elicits MMN even in the absence of conscious awareness. For example, (22) found  
92 that a pattern-violation MMN was generated by a deviation from a four-tone pattern even  
93 when the subjects did not consciously notice the pattern; see also (23).

94 An important examination of the relationship between the supposedly attention-dependent  
95 global rule representation and automatic local rule representation is whether the modulation of  
96 the local by the global rule (i.e., the interaction in the MMN timeframe) is present even when  
97 the subjects are not paying attention to the stimuli. This has not been systematically examined  
98 in the studies which have proposed the different neural underpinnings of the local and global  
99 rule representation (18-21). While several studies showed that attention did not interact with  
100 the local deviance effect, but did interact with the global deviance effect (10, 18, 19), this

101 does not, however, address the question whether the global rule is formed and affects the  
102 MMN processes in the absence of attention. The effect of interest is the interaction between  
103 local and global factors in the MMN time window, as this demonstrates whether the  
104 hierarchically higher global rule can influence the lower-level local rule. Consequently, to  
105 examine whether attention affects the global rule representation, the three-way interaction  
106 between attention, local and global factors in the MMN time window needs to be tested.

107 In this study we used the local/global paradigm under attended and unattended condition to  
108 examine whether the interaction between the local and global predictions is modulated by  
109 whether or not the stimuli are attended. In case the interaction between the local and global  
110 rules in the MMN timeframe is affected by the attention, this suggests that the extraction of a  
111 global regularity from an auditory stream is indeed attention-dependent. By contrast, in case  
112 the attention only affects the P3b elicitation but not the local-global interaction within the  
113 MMN timeframe, it suggests that the global rule extraction is performed without attention,  
114 and the P3b represents a different process which is attention-dependent, but independent from  
115 the global rule representation in the auditory stimulus processing.

116 In addition to N2 and P3b, we also examined the effect of the local and global rule violation  
117 under attended and unattended conditions on the P3a, a component with a frontocentral  
118 maximum following the negativity in the MMN timeframe, associated with the attention  
119 capture by the deviant stimulus. The P3a has been suggested to index the attentional capture  
120 by the deviant stimulus (13), and appears to be generated when the MMN reaches a certain  
121 threshold value. If the P3a demonstrates interaction of the local and global predictions, this  
122 would show that the attentional capture is either directly coupled to the magnitude of the  
123 MMN, or sensitive to the same contextual modulation as the MMN. By contrast, a lack of  
124 interaction would support the view that P3a generation is not directly coupled to the process  
125 that creates MMN. Further, by looking at the interaction with attention we can test whether

126 the attention to the stimuli gates the attentional shift, or whether it is independent of the  
127 attention.

128

## 129 **Methods**

### 130 *Participants*

131 The participants were 20 healthy young adults (10 female) recruited among the community of  
132 the University of Bergen. Three subjects' data was discarded due to excess movement  
133 artefacts during EEG session, the analyses are based on 17 subjects (7 female). The mean age  
134 of the 17 subjects was 25.4 years (range 21.1-34.8, sd 3.6). Subjects had no history of  
135 psychiatric or neurological disease (assessed by self-report) and had auditory thresholds <25  
136 dB in both ears for frequencies 250, 500, 1000, 2000 and 3000 Hz as assessed using the  
137 Hughson-Westlake audiometric test (Oscilla USB-300, Inmedico, Lystrup, Denmark). The  
138 subjects were asked to refrain from nicotine and caffeine for at least 5 hours before the  
139 recording. The participants were informed about the experimental procedures and signed an  
140 informed consent form. The study was approved by the regional ethics committee (REK-  
141 VEST)

142

### 143 *Paradigm*

144 The "Local-Global" MMN paradigm consisted of sequences of five tones. The tones were  
145 harmonic tones composed of three sinusoidal partials (tone A: 500, 1000, 1500 Hz; tone B:  
146 550, 1100, 1600 Hz) with 50 ms duration (including 7 ms rise and fall time). Interval between  
147 tones in a sequence was 100 ms, with total sequence length 650 ms. The sequences were  
148 either XXXXX (five identical tones, AAAAA and BBBBB) or XXXXY (fifth tone different,



149 AAAAB and BBBBA). The final tone in the sequence could thus be either local standard or  
150 local deviant.

151 The sequences were presented in blocks, with inter-sequence interval 700-900 ms (random  
152 variation with step 50 ms, mean 800 ms). Half of the blocks had 80% XXXXX sequences and  
153 20% XXXXY sequences, in the other half the frequency was reversed (80 % XXXXY  
154 sequences, 20 % XXXXX sequences). The sequences could thus be global standards (the  
155 dominant sequences) or global deviants (the rare sequences). This leads to a factorial design  
156 to probe the final tone of the sequence (global status: deviant/standard, local status:  
157 deviant/standard).

158 Each block began with 25 repetitions of the sequence which was the global standard for that  
159 block, serving as a model-building phase, following which 150 sequences were presented (in  
160 80/20 ratio). The block length was 4 minutes 22 seconds. Inter-block interval was 3 seconds.  
161 In total, 8 blocks were presented: four with XXXXX as global standard and four with  
162 XXXXY as global standard.

163 Two attentional conditions were used: attended and unattended stimulation. In the attended  
164 condition the subjects were asked to monitor the tones, compliance was checked by asking the  
165 subjects to report on the sound characteristics after the recording using a 5-item questionnaire.  
166 All subjects reported detecting some of the regularities present in the sound streams, with the  
167 average score 4.1 out of 5 possible (only three subjects scoring 2 or 3, the others 4 or 5). In  
168 the unattended condition the subjects were asked to perform a visual working memory task. In  
169 the visual n-back task abstract visual objects (Fribbles, TarrLab, <http://www.tarrlab.org>) were  
170 presented, asynchronously with the auditory stimuli, and the subjects asked to press a button  
171 in case the object was the same as 2 objects previously. Compliance was checked by  
172 examining the response profile of the visual n-back task. All subjects gave responses to the

173 visual task. The mean accuracy (proportion of hits and correct rejections) was 0.87 (range  
174 0.77-0.95, sd 0.06); the mean sensitivity index  $d'$  was 1.65 (range 0.82-2.74, sd 0.62).

175

### 176 *EEG recording and analysis*

177 The data were recorded in an electromagnetically shielded EEG recording chamber using 12  
178 Ag/AgCl electrodes (F3, Fz, F4, FCz, C3, Cz, C4, TP9, TP10, P3, Pz, P4) placed according to  
179 the International 10-20 system using the EasyCap electrode cap (Falk Minow Services,  
180 Breitenbrunn, Germany) and Abralyt 2000 electrode gel. Interelectrode impedance was kept  
181 under 10 k $\Omega$ . The reference electrode was placed at nosetip, the ground at FT10. Four  
182 electrodes were used for monitoring eye movements, two placed above and below the right  
183 eye and at the outer canthi of the eyes. The EEG data were recorded using BrainVision  
184 Recorder 1.0 (Brain Products, Munich, Germany). The sampling rate was 500 Hz, filter band  
185 0-100.

186 After recording, the data were offline filtered using a zero-phase Butterworth IIR filter with  
187 high-pass threshold 0.01 Hz (slope 12 dB/oct) and low-pass threshold 30 Hz (slope 12  
188 dB/oct). The data were downsampled to 250 Hz. Eye movements were removed using  
189 Gratton-Coles algorithm implemented in the BrainVision Analyzer. The data was epoched  
190 into segments relative to the onset of first tone in the 5-tone sequence. Epochs spanned from -  
191 100 to 1348 ms after the onset of the first tone, covering the entire 5-tone sequence.  
192 Automatic artefact detection was used, with epochs where the amplitude exceeded  $\pm 75 \mu\text{V}$   
193 were discarded. The final tone (which could deviate from the local or global rule) onset was at  
194 650 ms.

195 To reduce the effect of contingent negative variation between attended and unattended  
196 conditions, which could have affected the waveform from the beginning of the first tone, the

197 epochs were corrected to the mean of the 50-ms baseline before the onset of the final tone.  
198 Relative to the onset of the final tone, the N2 was quantified as the most negative value  
199 (averaging over +/- 20 ms around the peak) in the time window 50-250 ms in the electrode  
200 FCz; the mastoid positivity was examined as the most positive value in the same time window  
201 at the electrodes TP9 and TP10. We tested the N2 peak in the raw average waveform, for  
202 comparability with the previous studies using the local-global paradigm as used here.  
203 However, to reduce the contribution of other, attention-dependent potentials in the same  
204 timeframe, we also calculated the difference waves between the standard and global  
205 sequences and examined the MMN as a negativity evident in the difference wave between the  
206 3 types of deviant stimuli (local-only, global-only, local and global) and the standard stimulus  
207 (local and global standard). The three difference waves in both attended and unattended  
208 conditions were calculated, and for each subject the most negative value in the time window  
209 50-250 ms was extracted (mean around +/- 20 ms surrounding the peak).  
210 The P3a was quantified as the most positive value following N2 up to 400 ms post-deviant  
211 onset at the electrode FCz. Finally, the P3b was quantified as the area under the curve in the  
212 interval 300-500 ms at the electrode Pz.

213

#### 214 *Statistical analysis*

215 Extracted peak value analysis was performed on IBM SPSS Statistics version 25. The data  
216 were analyzed using a 2\*2\*2 repeated-measures general linear model, with factors Local  
217 status (standard/deviant), Global status (standard/deviant) and Attention  
218 (attended/unattended). The effect sizes were calculated as partial eta squares ( $\eta_p^2$ ), for post-  
219 hoc paired comparison the Cohen's d were calculated. The effects of interest are the two-way  
220 interaction between Local and Global factors, and the three-way interaction between Local,

221 Global and Attention for the peak values in the time window 50-250 ms (N2) as well as P3a  
222 time window, testing the contextual modulation of local deviance detection by N2 and P3a,  
223 respectively, and testing whether the contextual modulation of these peaks is affected by  
224 attention. In addition, in the P3b time window the effect of interest is the main effect of  
225 Global and interaction between Global and Attention, testing the sensitivity to the global rule  
226 as well as the attention-dependence of global rule representation by the P3b.  
227 In addition to the windowed analysis in pre-selected time intervals, we also estimated the  
228 GLM as specified above at each timepoint after the onset of the final tone to examine the time  
229 course of the attentional effects on the local and global status and their interaction on the  
230 ERPs. For significance testing we used the PALM package (Winkler et al., Neuroimage 2014)  
231 with the threshold-free cluster enhancement procedure, performing 8000 permutations; the p-  
232 values were corrected using familywise error correction.

233

## 234 **Results**

### 235 *N2 and MMN*

236 The waveforms for N2 as well as difference waveforms isolating the MMN component are  
237 depicted on Figure 1, row A and B. As can be seen in the difference waveforms (Fig.1, B), a  
238 clear MMN was present in all conditions; testing the peak amplitude at FCz electrode against  
239 zero indicated that the peak value was significantly below zero in all six conditions (all  
240  $p < .005$ ). We then examined the effect of the different experimental conditions on the N2 peak  
241 (Fig.1, A) using the factorial general linear model as described above. In FCz, there was a  
242 main effect of Local status ( $F(1,16)=22.4$ ;  $p < .001$ ,  $\eta_p^2 = .85$ , Global status ( $F(1,16)=87.1$ ;  
243  $p < .001$ ,  $\eta_p^2 = .58$ ) and Local\*Global interaction ( $F(1,16)=19.6$ ;  $p < .001$ ,  $\eta_p^2 = .55$ ). There were  
244 no significant main effects or interactions involving the Attention factor. Post-hoc pairwise

245 comparisons, collapsing over the Attention factor, showed that the standard vs deviant effect  
246 for the Local factor depended on the level of the Global factor: for items that were also global  
247 standards, the local standard-deviant difference was smaller (sta: -.93, dev: -1.45;  $t(16) = -1.6$ ,  
248  $p = .12$ ,  $d = .36$ ) than for items that were also global deviants (sta: -1.9, dev: -4.5;  $t(16) = -5.5$ ,  
249  $p < .001$ ,  $d = 1.5$ ).

250

251 *// Insert Figure 1 about here //*

252 *//Figure 1*

253 *A: The waveforms from FCz depicting the N2 and the P3a for attended (left) and unattended*  
254 *(right) condition.*

255 *B: The difference waveforms from FCz for the three deviant condition relative to the local and*  
256 *global standard condition, isolating the MMN component. All MMN peaks are significantly*  
257 *below zero (see text). The GLM with factors Attention and Type in FCz showed significant*  
258 *main effect of Type ( $F(2,32) = 33.2$ ,  $p < .001$ ), with no significant main or interaction effects of*  
259 *Attention. Pairwise comparison between the three types showed significant difference between*  
260 *local-global and the other two types.*

261 *C: The waveforms from Pz depicting the P3b for attended (left) and unattended (right)*  
262 *condition.//*

263

264 For the mastoid electrodes, additionally the Laterality factor was included in the GLM to  
265 assess whether the effects differ between left and right side. As there was a three-way  
266 interaction between Laterality, Local and Global ( $F(1,16) = 14.0$ ,  $p = .002$ ,  $\eta_p^2 = .47$ ), we  
267 performed separate GLMs in each of the electrode sites. In the left mastoid, there was a

268 significant main effect of Local status ( $F(1,16)=18.9$ ,  $p=.001$ ,  $\eta_p^2= .54$ ), Global status  
269 ( $F(1,16)=58.5$ ,  $p<.001$ ,  $\eta_p^2= .79$ ) and Local\*Global interaction ( $F(1,16)=29.3$ ,  $p<.001$ ,  $\eta_p^2=$   
270  $.65$ ). Same pattern was found in the right mastoid: there was a significant main effect of Local  
271 status ( $F(1,16)=10.5$ ,  $p=.005$ ,  $\eta_p^2= .40$ ), Global status ( $F(1,16)=13.8$ ,  $p=.002$ ,  $\eta_p^2= .46$ ) and  
272 Local\*Global interaction ( $F(1,16)=7.7$ ,  $p=.014$ ,  $\eta_p^2= .33$ ). There were no significant main  
273 effects or interactions involving the Attention factor in either of the mastoid electrodes. The  
274 effect sizes suggest that the three-way interaction involving the electrode factor was due to  
275 difference in effect sizes, but not due to differences in the overall pattern of associations. Post-  
276 hoc pairwise comparisons, collapsing over Attention factor, showed same pattern as in FCz:  
277 the standard vs deviant effect for the Local factor depended on the level of the Global factor.  
278 In the left mastoid, for items that were also global standards, the local standard-deviant  
279 difference was smaller (sta: 1.1, dev 1.3,  $t=1.11$ ,  $p=.28$ , Cohen's d: 0.28) than for the items  
280 that were also global deviants (sta: 1.8, dev: 3.34,  $t=5.5$ ,  $p<.001$ , Cohen's d: 1.3). In the right  
281 mastoid, similar pattern was seen: for items that were also global standards, the local  
282 standard-deviant difference was smaller (sta: .66, dev: 1.03,  $t=2.09$ ,  $p=.05$ , Cohen's d: .53)  
283 than for the items that were also global deviants (sta: 1.3, dev 2.28,  $t=3.4$ ,  $p=.004$ , Cohen's d:  
284 .91).

285

### 286 *P3a*

287 The waveform demonstrating P3a is depicted on Figure 1 (A). There was a main effect of  
288 Local status ( $F(1,16)=6.6$ ,  $p=.02$ ,  $\eta_p^2= .29$ ) and Global status ( $F(1,16)=14.5$ ,  $p=.002$ ,  $\eta_p^2= .48$ ),  
289 with deviant stimuli eliciting larger amplitude than standard stimuli, and Attention  
290 ( $F(1,16)=10.9$ ,  $p=.005$ ,  $\eta_p^2= .41$ ), with attended stimuli eliciting larger amplitude than  
291 unattended stimuli. The Local\*Global interaction as well as Local\*Global\*Attention  
292 interaction were not significant. However, there was a significant interaction between

293 Attention\*Global ( $F(1,16)=16.7$ ,  $p=.001$   $\eta_p^2=.51$ ). Post-hoc pairwise comparisons, collapsing  
294 over the Local factor showed that the global-deviants and global-standards differed only in the  
295 attended condition (5.58 vs 2.7,  $t=4.6$ ,  $p<.001$ , Cohen's  $d: 1.6$ ); while there was no significant  
296 difference in the unattended condition (1.99 vs 1.83,  $t=.42$ ,  $p=.68$ , Cohen's  $d: 0.11$ ).

297

### 298 *P3b*

299 The waveform showing P3b in the electrode Pz is depicted on Fig.1, C. There was a  
300 significant main effect of Global status ( $F(1,16)=11.6$ ,  $p=.004$ ;  $\eta_p^2=.42$ ), Attention  
301 ( $F(1,16)=13.8$ ,  $p=.002$ ;  $\eta_p^2=.46$ ), and a significant interaction between Global status and  
302 Attention ( $F(1,16)=38.0$ ,  $p<.001$ ;  $\eta_p^2=.70$ ). Post-hoc pairwise comparisons, collapsing over  
303 the Local factor showed that the global-deviants compared to global-standards were more  
304 positive only during attended condition (3.2 vs .68,  $t=5.4$ ,  $p<.001$ , Cohen's  $d: 2.2$ ), whereas  
305 during unattended condition the deviants were slightly more negative than standards (-.07 vs  
306 .52,  $t=-2.2$ ,  $p=.04$ , Cohen's  $d: -0.58$ ). Other effects were not significant.

307

### 308 *Timepoint-by-timepoint analysis*

309 The results of the permutation tests are shown on Figure 2. They indicate that the  
310 Local\*Global interaction effect demonstrated in the peak analysis above extends across the  
311 frontal and central electrodes, stronger on the midline and right, whereas the Attention\*Global  
312 interaction shown for P3b encompasses not only the parietal but also central electrodes and  
313 lasts from approximately 300 ms post-deviant onset to the end of the epoch. The timepoint-  
314 by-timepoint analysis also confirms that the three-way interaction between local and global  
315 status and attention is not significant anywhere, at most a weak trend can be seen in a small  
316 number of timepoints in electrodes F3 and C3. Also, attention does not interact with the Local

317 factor anywhere, supporting the notion that MMN generation is not modulated by attention, at  
318 least in situations where attention does not lead to substantial reorganization of the auditory  
319 stream. Of note is a discrepancy between Local and Global factors in the P3a: while the  
320 Local deviants lead to a significant effect in the P3a range starting quite early (~200 ms post-  
321 deviant and centrally located, suggesting that it is the early, attention-independent phase of the  
322 P3a), by contrast the effect did not survive the familywise error correction for the Global  
323 factor. The later, 300-ms onset effect in frontocentral and central electrodes visible in  
324 Attention\*Global plot could be related to the later phase of the P3a. Finally, it is noticeable  
325 that both Local and Global factors have a significant effect in the bilateral mastoid electrodes  
326 after ~250 ms post-deviant onset, and the effect extends longer in the Global than Local. This  
327 could indicate the auditory cortex-level model readjustment.

328

329 *// Insert Figure 2 about here //*

330 *//Figure 2*

331 *The timepoint-by-timepoint permutation analysis, showing p-values (family-wise error*  
332 *corrected) for the effects of the factors Local, Global, Attention and their interactions. No*  
333 *timepoints were significant for Attention\*Local and Attention\*Local\*Global analysis.//*

334

## 335 **Discussion**

336 In this experiment we exposed subjects to a hierarchical auditory structure where the  
337 frequency of a tone was predicted by two independent rules in a factorial design: a local rule  
338 in relation to immediate environment and a global rule applying over longer timeframe. The  
339 local rule violation as well as the global rule violation elicited a negativity in the N2



340 timeframe, having the characteristics of a classical MMN response (frontal negativity and  
341 simultaneous mastoid positivity). As has been observed in earlier studies (10, 18, 20, 21), the  
342 global rule violation elicited a P3b wave only in the attended condition, confirming that the  
343 attention manipulation was successful. However, despite the absence of P3b for unattended  
344 global deviants, there was a significant interaction between the local and the global rule in the  
345 MMN timeframe which did not interact with the attention factor, indicating that even though  
346 the global rule violations were not registered by the P3b-generating system, they influence the  
347 MMN. The results demonstrate that the processes indexed by the negativity in the MMN  
348 timeframe are sensitive to both the local as well as the global status of a sound. If the  
349 predictions made by observing the local and the global level transitional probability agree, the  
350 amplitude of the negativity is either large (unpredictable on both levels) or small (predictable  
351 on both levels). However, if the transitional probabilities predicted by the two levels conflict,  
352 the resulting probability is intermediate, as if the two levels would cancel each other out. This  
353 interaction between the local and global predictions indicates that the two are carried out by  
354 different neural correlates which interact within the MMN timeframe.

355 It is also evident that the interaction of these local and global predictors is not sensitive to  
356 attention, as there was no significant interaction effect with attention. This further suggests  
357 that the formation of the global rule does not require conscious attention, in contrast to claims  
358 by earlier studies (10, 18, 20). We demonstrated that the ERPs in the MMN range are  
359 sensitive to the modulation by the global probability of a five-tone sequence in its block, even  
360 while the subjects were attending a visual working memory task. This indicates that the  
361 representation of auditory environment in the order of several seconds and consisting of more  
362 complex patterns is carried out by the brain without needing the conscious attentional  
363 resources. The pattern of significant main effects of local and global as well as interaction  
364 between local and global factors seen at the frontocentral electrode was replicated in the

365 mastoids, indicating that the observed pattern was not due to contamination from any other  
366 attentional effects which are typically expressed in the frontocentral, but not in the mastoid  
367 locations (24).

368 An alternative interpretation of the results is the differences in the transitional probability of  
369 the tones across different conditions. The local deviant consisted of a physically different tone  
370 relative to the four preceding tones (XXXXY sequence). The interaction effect indicates that  
371 the ERP elicited by the final Y-tone had a different amplitude in the XXXXY block, where Y-  
372 tones made up 16 % of all the tones, compared to the XXXXX block, where Y-tones made up  
373 4 % of all the tones. Thus the difference in the amplitude would be consistent with the  
374 observation that the standard *vs.* deviant difference increases with reduced overall probability  
375 of the deviant tone (5). By this interpretation, the effects would not be due to a global rule  
376 interacting with a local rule, but could represent factors such as stronger stimulus-specific  
377 adaptation in the XXXXX blocks. However, such explanation does not agree with the effect  
378 of Global status on the negativity in the MMN timeframe in the XXXXX sequences. While  
379 locally standard, the N2 amplitude to the final x-tone differed depending on whether the  
380 sequence was embedded in an XXXXX-block or XXXXY-block, an effect also seen when  
381 examining the difference waveforms isolating the MMN component (Fig.1). The overall  
382 probability of the x-tone in these different blocks was 96 % and 84 % respectively, which  
383 means it would have been a local standard in both conditions. Thus, the modulation of the  
384 negativity by the sequence-final X-tone could not be due to the local transitional probability  
385 relative to the previous tone but reflected the global rule of the probability of the XXXXX-  
386 sequence relative to the block. This finding agrees with the literature demonstrating complex  
387 and long-timewindow regularity representation in the auditory cortex, as indexed by MMN  
388 (11, 23).

389 We additionally characterized the MMN wave generated by the deviants relative to the  
390 standard sequence. The difference waves relative to sequence which was both a local and a  
391 global standard (Fig.1, B) show the expected significant negativity in all three deviant  
392 conditions.

393 The parallel representation of the local and global rule is consistent with the studies on multi-  
394 feature MMN, which have looked at the effect of violating predictions regarding different  
395 physical features of a sound independently (simple deviation) or in conjunction (abstract  
396 deviation). As demonstrated by Takegata et al. (25), representation of the simple and abstract  
397 rules was carried out in parallel, and the simultaneous deviation from both of these generated  
398 a MMN waveform which was explained by a model of combined effect of the two types of  
399 rules. In the present case, the effect was interactive rather than additive, but the parallel  
400 representation of two rules in predicting the same feature is in agreement with this model. The  
401 present results add the perspective that the more higher-order rule may consist of auditory  
402 Gestalt representation with relatively long time-window, as the representation of the global  
403 rule here needed to maintain a representation of at least the previous 5300 ms to hold two  
404 repetitions of the standard sequences (considered to be the minimum standard-building  
405 requirement) and react to the deviation in the final tone of the subsequent sequence.

406 In contrast to the N2, the results in the P3a and P3b showed that their representation of  
407 violation of predictions was modified by attention. There was a slight divergence in their  
408 response. P3b was not sensitive to local status of the sound. This has in earlier literature led to  
409 suggestion that P3b is uniquely representing the higher, block-level status of incoming  
410 information, which is dependent on attention, and is unable to operate when the attentional  
411 resources are removed (10, 18, 20). The current results demonstrate that this is not the full  
412 picture. P3b is indeed sensitive to interaction between global status and attention: the global  
413 deviants and standards differed only in the auditory attention condition, and did not differ in

414 the unattended condition when the subjects were performing a visual n-back task as a  
415 distractor. However, as discussed above, the modulation of the N2 by the global rule was  
416 clearly present in the attended as well as unattended condition. This indicates that the  
417 processes leading to negativity in the MMN timeframe could track the global status of the  
418 sound even under conditions where the P3b was not capable of representing it. Therefore, the  
419 data does not support the view that global rule representation is uniquely performed by a  
420 system where violation generates P3b. Instead, the P3b appears to index conscious, attentional  
421 processing of the attended sequences. This is consistent with the theories interpreting P3b as  
422 an index of detecting events which are salient or important relative to the currently maintained  
423 goal state (26, 27).

424 The P3a, unlike P3b, was sensitive to the local status of the tone, similarly to N2. This is in  
425 agreement with findings of P3a following the violations which elicit the MMN. The P3a,  
426 linked to frontal lobe as well as medial temporal lobe, is frequently associated to novelty  
427 processing. In the context of auditory oddball studies it has been associated to orienting  
428 attention toward the deviant sound, or evaluating the contextual novelty of sounds (13).  
429 However, the effect was not modulated by the global rule, corroborating the suggestions that  
430 P3a generation is not directly dependent on the amplitude of MMN, instead it depends on  
431 processes happening prior to MMN generation. Also, there was no significant interaction  
432 between Local and Attention factors: both attended and unattended local deviants elicited P3a  
433 with similar amplitude. However, similarly to P3b, there was an interaction between global  
434 status and attention: the effect of the global status on the amplitude change during deviant  
435 compared to standard was larger under the attention condition than visual distractor condition.  
436 As indicated by the timepoint-by-timepoint permutation analysis, this may be due to two  
437 effects overlapping in the same time-window in the FCz electrode: an earlier Local effect  
438 which starts at ~200 ms post-deviant onset and extends from frontal to central electrodes and

439 a later Attention\*Global effect which begins ~250-300 ms post-deviant onset and is confined  
440 to frontocentral and central locations. Considering the distribution, it seems plausible that the  
441 early, post-200 ms component of the P3a, which is attention-independent and with more  
442 frontal location (13) is distinct from the later-onset component which appears to behave more  
443 similarly to P3b.

444 The effect of attention on prediction error processing is debated. Kok et al. (28) and Garrido  
445 et al. (29) explored two possibilities: attention and unpredictability each lead to increased  
446 processing, but there is no interaction between them; vs an interactive model where attention  
447 “flips” the preference so that under attention, predicted stimuli receive more processing,  
448 whereas in unattended condition, unpredicted stimuli are processed more. Garrido et al. (29)  
449 showed that for auditory stimuli the model where attention and prediction give independent  
450 boosting effects is preferred over interaction-model. The present study similarly suggests that  
451 the interaction of attention and prediction on early sensory processing shown by Kok et al.  
452 (28) is not robustly found in all experimental situations, and may thus reflect effects specific  
453 to visual processing. The present results are in agreement with Garrido et al. (29), in  
454 demonstrating independence of attention and prediction in the N2 time range. There was a  
455 main effect of Attention across all EEG channels from ~250 ms after the onset of the final  
456 stimulus, however, the local unpredictability did not show interaction with this effect, and led  
457 to effects around 150 ms. While the global predictions and attention interaction was seen from  
458 250 ms in central and parietal electrodes, the effect was characterized by increased processing  
459 of unpredicted sequences compared to predicted sequences, opposite to the prediction made  
460 by (28), while typical for oddball studies on P300 ERP. While attention and prediction  
461 interaction at 190 ms has been reported by (30) in an MEG study, that study had low number  
462 of deviant trials and found the interaction effect in the right temporal sensors following the

463 main mismatch negativity response, thus possibly rather reflecting processes related to the  
464 P3a.

465

#### 466 **Conclusion**

467 An important finding of this paper is demonstrating the independence of the P3b and the  
468 global rule representation. While the global deviants compared to global standards elicited  
469 P3b wave only in the attended condition, similarly to previous reports, the modulation of the  
470 N2 by the global rule was clearly present in the attended as well as unattended condition. This  
471 was visible both when considering the N2 peak as a simple or difference waveform, revealing  
472 MMN and removing any other components which may be expressed in the same time  
473 window. The data show that in the local-global paradigm the P3b elicitation marks the  
474 presence of deviant sound sequences when asked to attend the sounds, but the global status  
475 affects the sound processing already earlier, in the N2 window where the MMN is typically  
476 expressed. While the N2 window demonstrates interaction between the local and global rule  
477 representation, this is independent of attention. This adds to the body of literature showing  
478 that the MMN process in the N2 time window is robust and does not show sensitivity to  
479 central executive load.

480

481

482

## 483 References

- 484 1. Friston K. A theory of cortical responses. *Philosophical transactions of the Royal Society B:*  
485 *Biological sciences.* 2005;360(1456):815-36.
- 486 2. Kiebel SJ, Daunizeau J, Friston KJ. A hierarchy of time-scales and the brain. *PLoS*  
487 *computational biology.* 2008;4(11):e1000209.
- 488 3. Hickok G, Houde J, Rong F. Sensorimotor integration in speech processing: computational  
489 basis and neural organization. *Neuron.* 2011;69(3):407-22.
- 490 4. Näätänen R. The mismatch negativity: a powerful tool for cognitive neuroscience. *Ear and*  
491 *hearing.* 1995;16(1):6-18.
- 492 5. Näätänen R, Paavilainen P, Rinne T, Alho K. The mismatch negativity (MMN) in basic research  
493 of central auditory processing: a review. *Clinical neurophysiology.* 2007;118(12):2544-90.
- 494 6. Kompus K, Westerhausen R, Craven AR, Kreegipuu K, Pöldver N, Passow S, et al. Resting-state  
495 glutamatergic neurotransmission is related to the peak latency of the auditory mismatch negativity  
496 (MMN) for duration deviants: An 1H-MRS-EEG study. *Psychophysiology.* 2015;52(9):1131-9.
- 497 7. Garrido MI, Kilner JM, Stephan KE, Friston KJ. The mismatch negativity: a review of  
498 underlying mechanisms. *Clinical neurophysiology.* 2009;120(3):453-63.
- 499 8. Wacongne C, Changeux J-P, Dehaene S. A neuronal model of predictive coding accounting for  
500 the mismatch negativity. *Journal of Neuroscience.* 2012;32(11):3665-78.
- 501 9. Winkler I. Interpreting the mismatch negativity. *Journal of Psychophysiology.* 2007;21(3-  
502 4):147-63.
- 503 10. Bekinschtein TA, Dehaene S, Rohaut B, Tadel F, Cohen L, Naccache L. Neural signature of the  
504 conscious processing of auditory regularities. *Proceedings of the National Academy of Sciences.*  
505 2009;106(5):1672-7.
- 506 11. Paavilainen P. The mismatch-negativity (MMN) component of the auditory event-related  
507 potential to violations of abstract regularities: a review. *International journal of psychophysiology.*  
508 2013;88(2):109-23.
- 509 12. Cornella M, Leung S, Grimm S, Escera C. Detection of simple and pattern regularity violations  
510 occurs at different levels of the auditory hierarchy. *PLoS One.* 2012;7(8):e43604.
- 511 13. Escera C, Corral M. Role of mismatch negativity and novelty-P3 in involuntary auditory  
512 attention. *Journal of Psychophysiology.* 2007;21(3-4):251-64.
- 513 14. Friedman D, Cycowicz YM, Gaeta H. The novelty P3: an event-related brain potential (ERP)  
514 sign of the brain's evaluation of novelty. *Neuroscience & Biobehavioral Reviews.* 2001;25(4):355-73.
- 515 15. Horváth J, Winkler I, Bendixen A. Do N1/MMN, P3a, and RON form a strongly coupled chain  
516 reflecting the three stages of auditory distraction? *Biological psychology.* 2008;79(2):139-47.
- 517 16. Rinne T, Särkkä A, Degerman A, Schröger E, Alho K. Two separate mechanisms underlie  
518 auditory change detection and involuntary control of attention. *Brain research.* 2006;1077(1):135-43.
- 519 17. Sussman E, Ritter W, Vaughan Jr HG. Attention affects the organization of auditory input  
520 associated with the mismatch negativity system. *Brain research.* 1998;789(1):130-8.
- 521 18. Chennu S, Noreika V, Gueorguiev D, Blenkmann A, Kochen S, Ibáñez A, et al. Expectation and  
522 attention in hierarchical auditory prediction. *Journal of Neuroscience.* 2013;33(27):11194-205.
- 523 19. Marti S, Thibault L, Dehaene S. How does the extraction of local and global auditory  
524 regularities vary with context? *PLoS one.* 2014;9(9):e107227.
- 525 20. Strauss M, Sitt JD, King J-R, Elbaz M, Azizi L, Buiatti M, et al. Disruption of hierarchical  
526 predictive coding during sleep. *Proceedings of the National Academy of Sciences.*  
527 2015;112(11):E1353-E62.
- 528 21. Wacongne C, Labyt E, van Wassenhove V, Bekinschtein T, Naccache L, Dehaene S. Evidence  
529 for a hierarchy of predictions and prediction errors in human cortex. *Proceedings of the National*  
530 *Academy of Sciences.* 2011;108(51):20754-9.
- 531 22. Herholz SC, Lappe C, Pantev C. Looking for a pattern: An MEG study on the abstract mismatch  
532 negativity in musicians and nonmusicians. *BMC Neuroscience.* 2009;10(1):42.

- 533 23. Horvath J, Czigler I, Sussman E, Winkler I. Simultaneously active pre-attentive representations  
534 of local and global rules for sound sequences in the human brain. *Cognitive Brain Research*.  
535 2001;12(1):131-44.
- 536 24. Kujala T, Tervaniemi M, Schröger E. The mismatch negativity in cognitive and clinical  
537 neuroscience: theoretical and methodological considerations. *Biological psychology*. 2007;74(1):1-19.
- 538 25. Takegata R, Paavilainen P, Näätänen R, Winkler I. Independent processing of changes in  
539 auditory single features and feature conjunctions in humans as indexed by the mismatch negativity.  
540 *Neuroscience Letters*. 1999;266(2):109-12.
- 541 26. Polich J. Updating P300: an integrative theory of P3a and P3b. *Clinical neurophysiology*.  
542 2007;118(10):2128-48.
- 543 27. Walentowska W, Moors A, Paul K, Pourtois G. Goal relevance influences performance  
544 monitoring at the level of the FRN and P3 components. *Psychophysiology*. 2016;53(7):1020-33.
- 545 28. Kok P, Rahnev D, Jehee JF, Lau HC, De Lange FP. Attention reverses the effect of prediction in  
546 silencing sensory signals. *Cerebral cortex*. 2011;22(9):2197-206.
- 547 29. Garrido MI, Rowe EG, Halász V, Mattingley JB. Bayesian mapping reveals that attention  
548 boosts neural responses to predicted and unpredicted stimuli. *Cerebral Cortex*. 2017:1-12.
- 549 30. Auksztulewicz R, Friston K. Attentional enhancement of auditory mismatch responses: a  
550 DCM/MEG study. *Cerebral Cortex*. 2015;25(11):4273-83.

551



ATTENDED

UNATTENDED

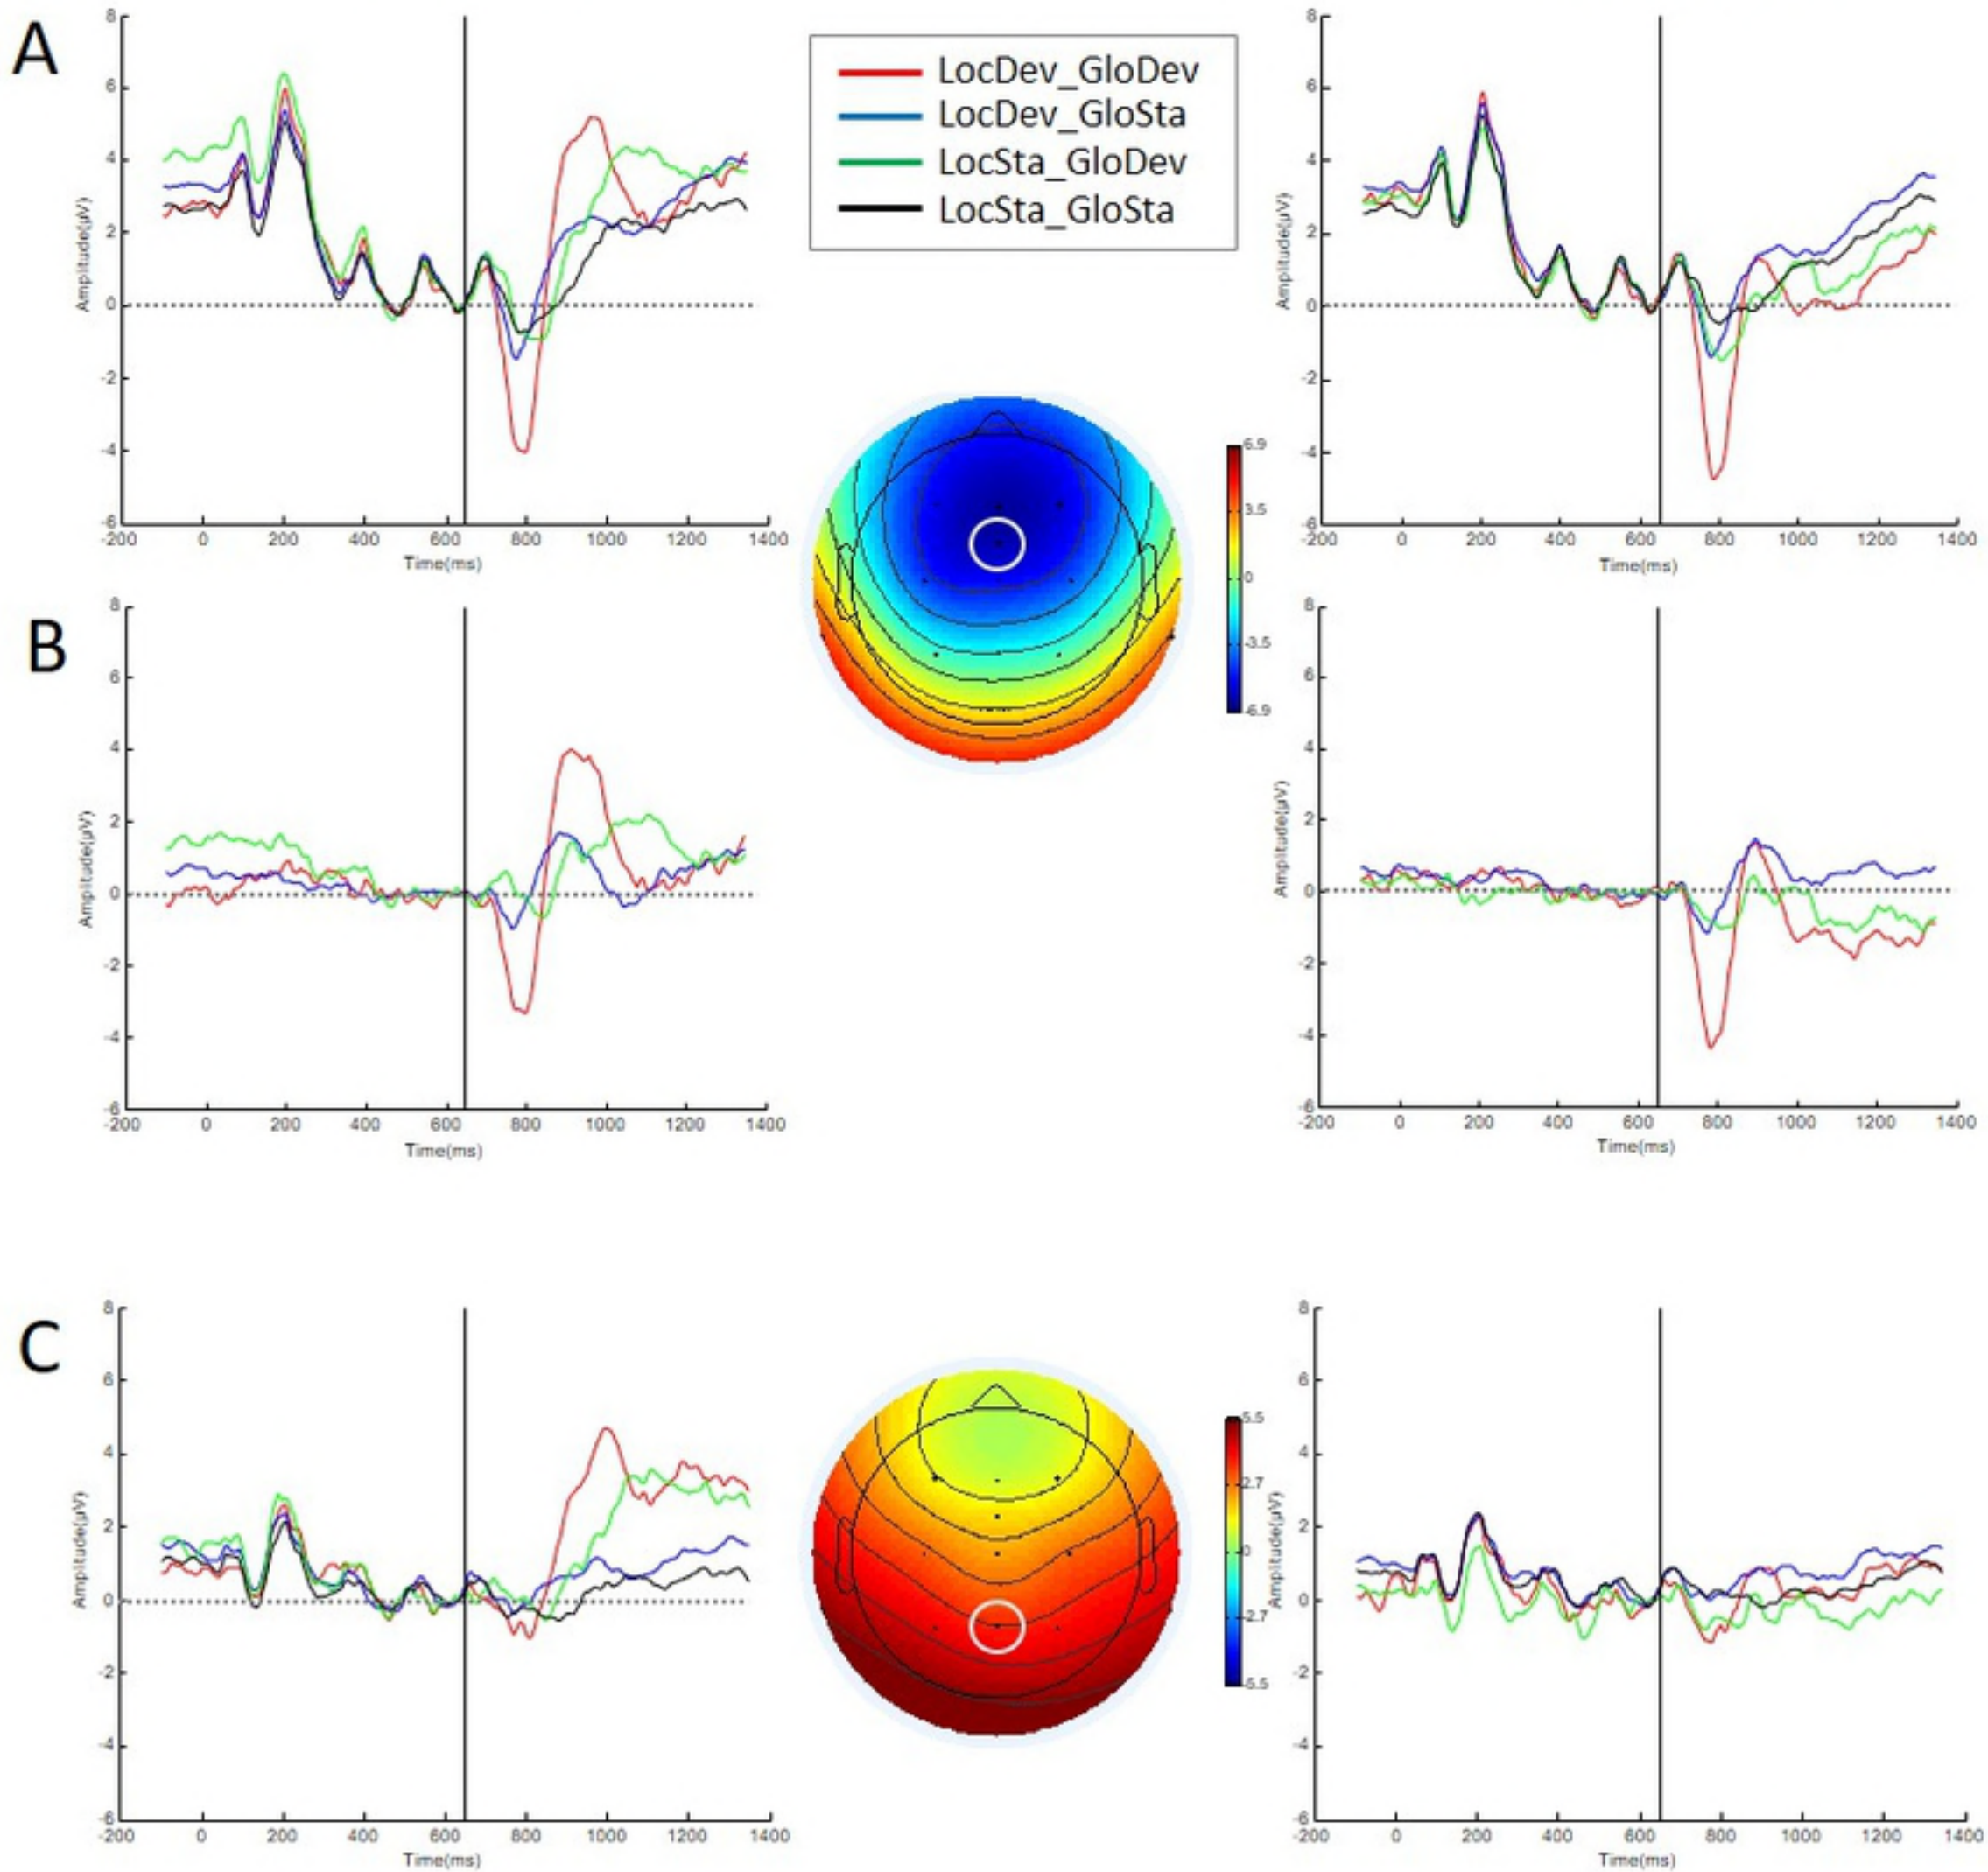

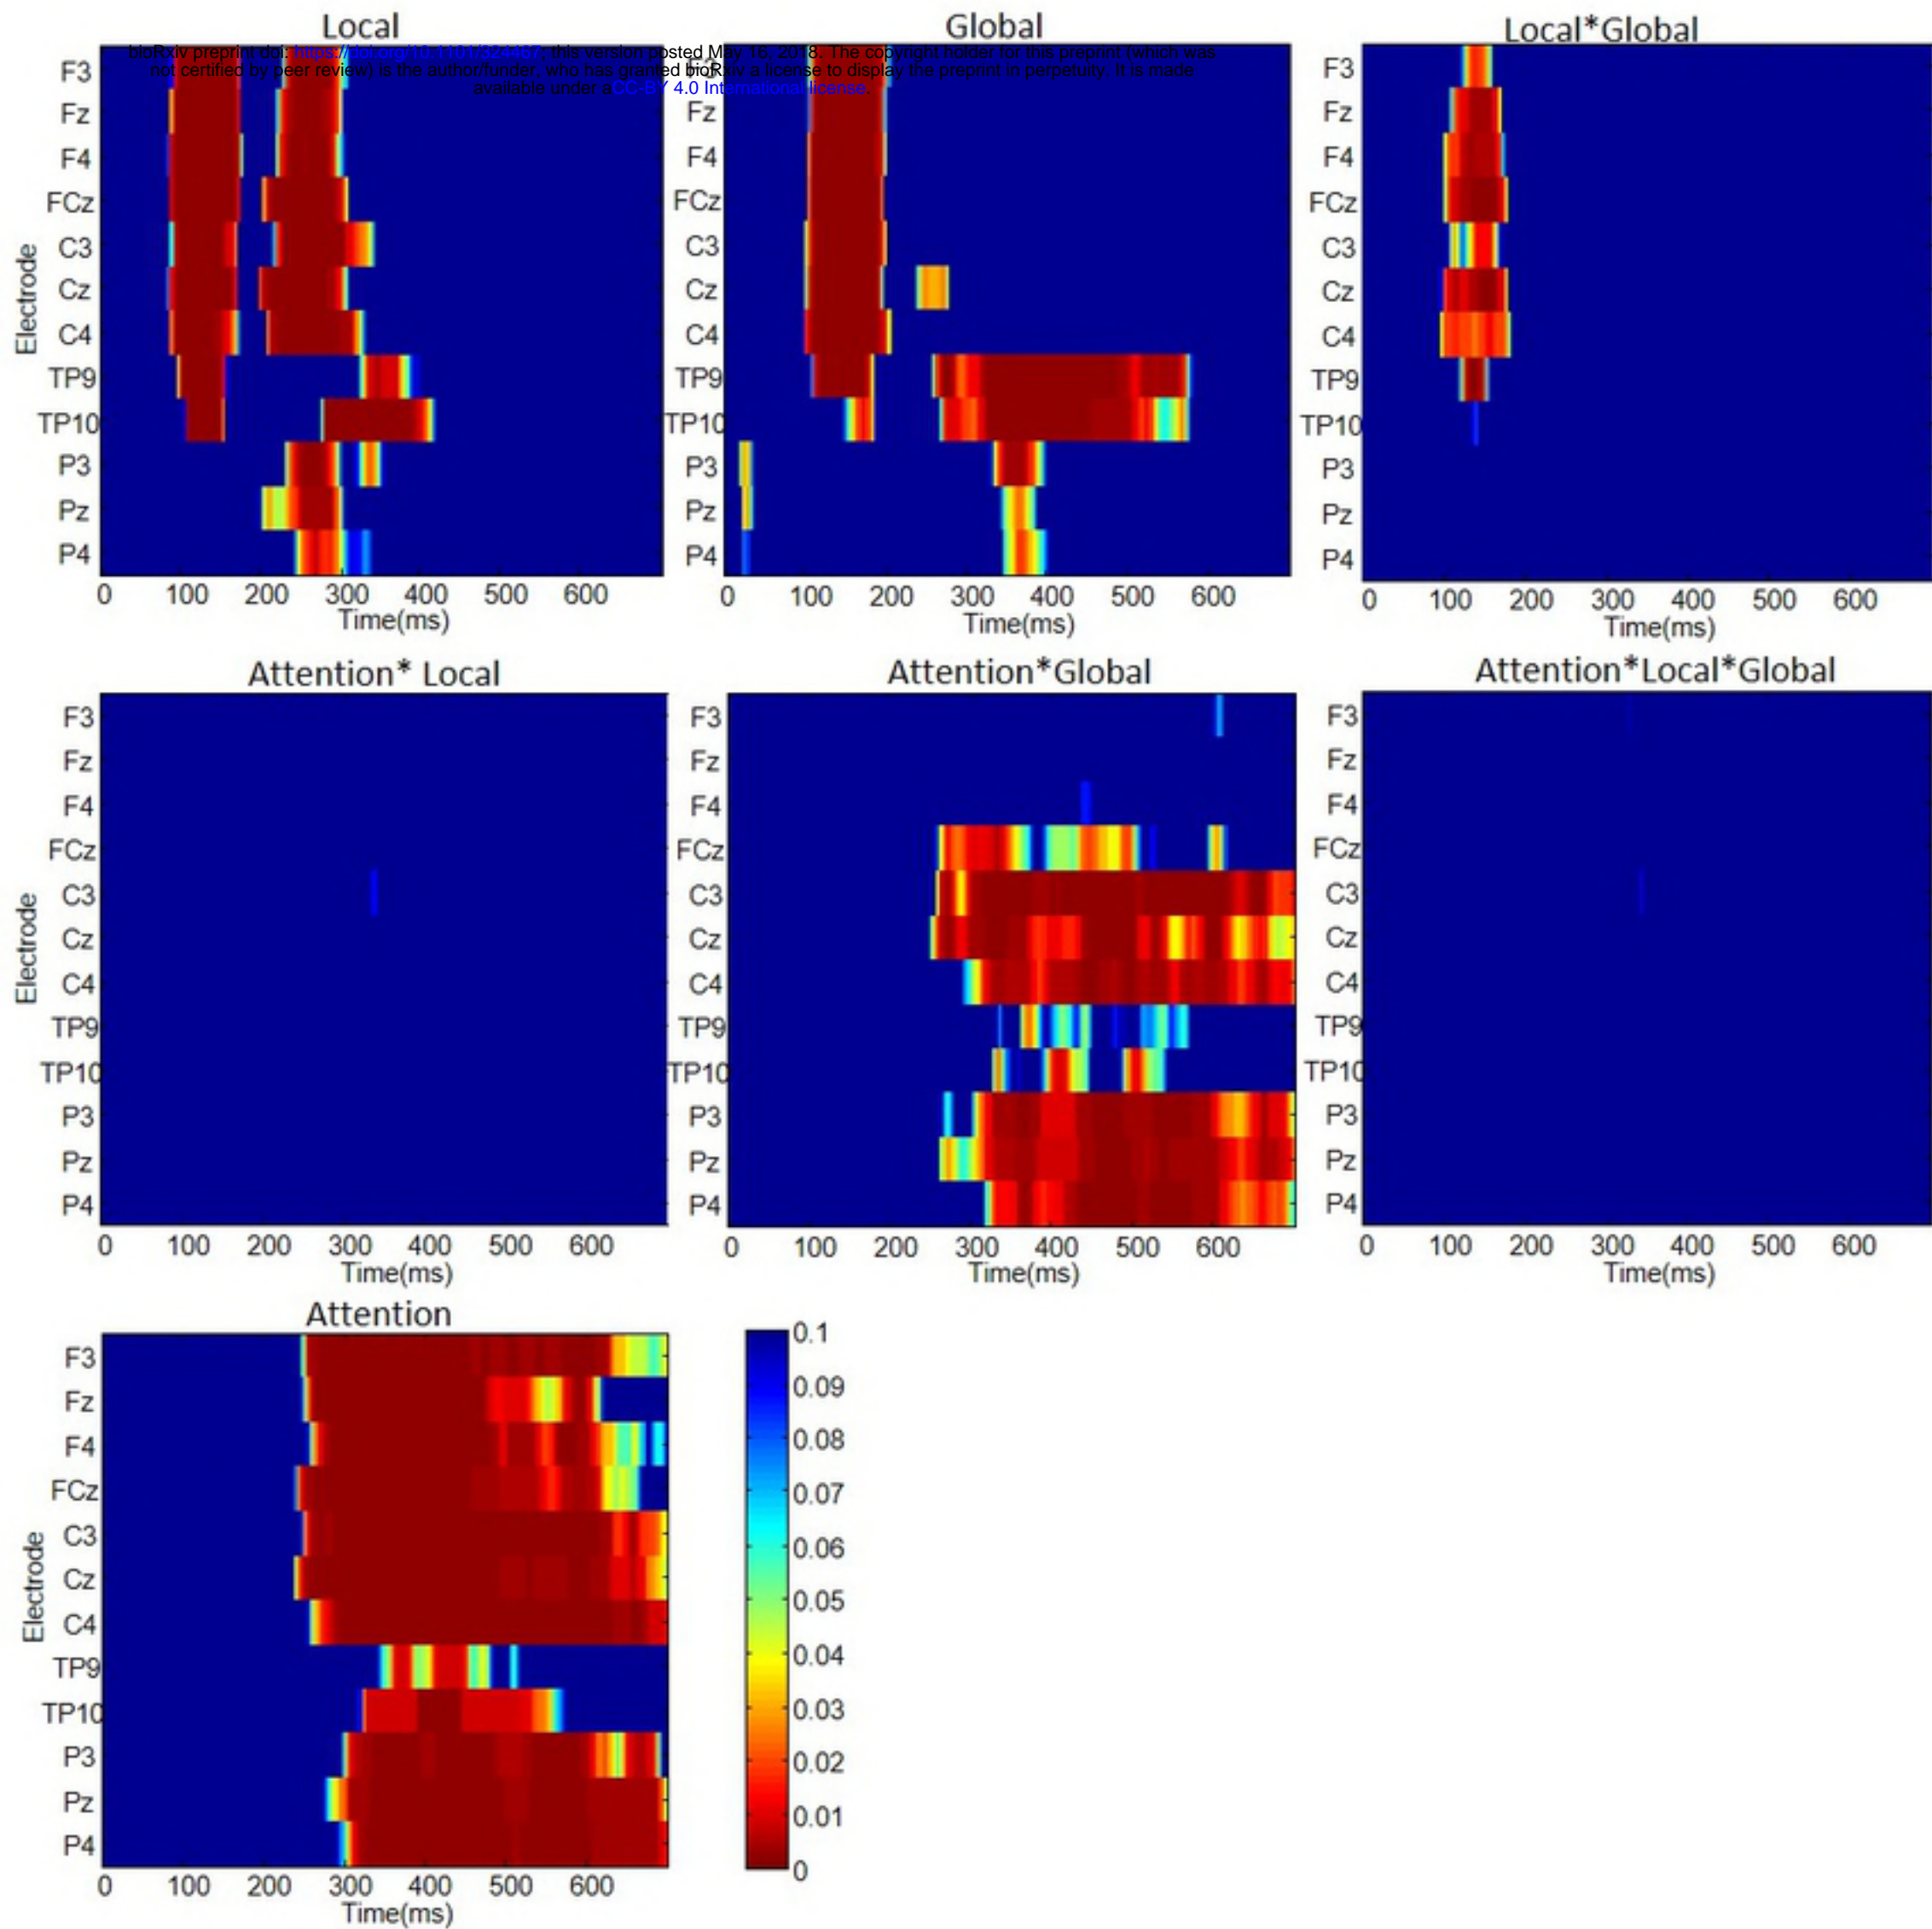

Source: http://biorxiv.org/content/10.1101/324467v1.full.pdf
